# Supplementary material for: Lactobacillus murinus HF12 colonizes neonatal gut and protects rats from necrotizing enterocolitis
Source: PLoS One. 2018 Jun 22;13(6):e0196710. doi: 10.1371/journal.pone.0196710 (PMC6014650; doi:10.1371/journal.pone.0196710)
Supplement: S1 Data File — (XLSX) [file pone.0196710.s001.xlsx]

## Sheet: Sheet1
Litter	Animal	NEC grade	Load	HF2	HF3	HF6	HF7	HF8	HF9	HF11	HF12	HF13	HF17	HF18	HF20	HF24	HF25	HF57	HF63	HF78		Lm load	lg lacto load	##	Load	Lactobacillus	Streptococcus	Enterococcus	Staphylococcus	Bacillus	Rothia	Enterobacteriaceae	Lactococcus		Proteus	Cloacibacterium	Rhodococcus		Paenibacillus		other
HL3	BB1-FF	2	310000								0.04	0.96										1200	3.1	1	28000	0.35	0.1	0.15	0.08	0.04	0.05	0.14	0.08								0.01
	BB2-FF	0	1700								1											1700	3.2	Missing
	BB3-FF	0	24000	0.057							0.817	0.102					0.024					20000	4.3	Missing
	BB4-FF	0	500								1											500	2.7	Missing
	C1-BF	0	20000000	0.241							0.759
	C2-BF	0	11000000	0.1							0.9
	C3-BF	0	2200000	0.09							0.91
	C4-BF	0	20000000	0.3							0.7
HL4	BB5-FF	3	8900000								0.034	0.798	0.101	0.067								300000	5.5	2	13000000	0.19	0.04	0.04	0.21	0.04	0.05	0.41	0.02
	BB6-FF	1	75000000						0.008		0.3			0.642	0.05							22000000	7.3	3	33000000	0.69	0.03	0.22			0.05		0.01
	BB7-FF	1	11000000								0.29		0.1	0.58	0.03							3200000	6.5	4	5800000	0.76	0.02	0.1	0.09			0.02	0.01
	BB8-FF	2	100000000								0.001		0.2	0.8								100000	5	5	9800000	0.36	0.05	0.27	0.08		0.2	0.04
	BB9-FF	2	17000000								0.1		0.54	0.36								1700000	6.2	Missing
HL5	JL1-FF	4	100000						0.72		0.11		0.07	0.1								10000	4	56	62000	0.02	0.14	0.15	0.01	0.06		0.53	0.03				0.03				0.01
	JL2-FF	2	41000						0.1		0.05	0.49	0.02			0.24	0.1					2000	3.3	57	51000	0.04	0.13	0.04	0.02	0.06		0.63	0.02			0.01	0.02				0.03
	JL3-FF	0	1700								0.7	0.06	0.24									1200	3.1	58	1900	0.03	0.02	0.06	0.04	0.27		0.35	0.05				0.16				0.02
	JL4-FF	2	7000000						0.03			0.86	0.014			0.1						0	0	59	1100000	0.33	0.03	0.05	0.01	0.17		0.28	0.05				0.05				0.03
	JL5-FF	2	1400000						0.425		0.2	0.2				0.035	0.14					280000	5.4	60	7700000	0.06	0.01		0.01	0.22		0.38	0.05			0.08	0.16				0.03
	JL6-FF	3	1.2e+107								0.08	0.83		0.05	0.04							1000000	6	61	6700000		0.02		0.03	0.53		0.18	0.03		0.01	0.02	0.18
	JL7-FF	2	430000						0.061			0.939										0	0	62	2400000	0.07	0.01	0.01	0.01	0.08		0.52	0.07			0.07	0.11				0.05
HL6	BB28-FF	2	220000000						0.135		0.1			0.595	0.16							22000000	7.3	24	130000000	0.01	0.05	0.21	0.08			0.63	0.01								0.01
	BB29-FF	2	330000000						0.075		0.155			0.61	0.16							50000000	7.7	25	140000000	0.58	0.08	0.04	0.15			0.02	0.05				0.03
	BB30-FF	1	3600						0.08					0.78	0.14							0	0	26	12000	0.05	0.08					0.84
	BB32-FF	2	78000000		0.005				0.005		0.1				0.89							7800000	6.9	27	200000000	0.01	0.09	0.01				0.83	0.01				0.04
	BB35-FF	3	23000000						0.4				0.17	0.43								0	0	29	42000000	0.05	0.02	0.2				0.02	0.01		0.67
	BB36-FF	2	1200000						0.33					0.67								0	0	30	740000	0.02	0.08	0.45	0.01			0.4	0.02
	BB37-FF	1	61000000						0.18		0.275			0.545								17000000	7.2	31	8000000	0.26	0.09	0.1	0.02			0.39	0.05				0.08
	BB38-FF	2	59000000						0.34		0.15			0.51								9000000	7	32	33000000	0.01	0.29	0.16				0.45	0.09
HL7	181G1-FF	0	320000			0.001					0.93				0.009					0.06		300000	5.5	94	200000	0.06	0.1	0.28		0.04	0.17	0.18	0.16								0.01
	181G2-FF	0	530000				0.2	0.06	0.25		0.26				0.23							140000	5.1	95	480000	0.28	0.12	0.43	0.02	0.02	0.02	0.03	0.07								0.01
	181G4-FF	0	900			0.11	0.22				0.56									0.11		500	2.7	96	3100	0.83	0.04	0.02			0.05	0.02	0.02								0.02
	182G1-FF	0	40000								0.75				0.25							30000	4.5	97	88000	0.04	0.2	0.31			0.11	0.17	0.08								0.03
	182G2-FF	0	350000			0.01		0.26			0.37				0.07					0.26		130000	5.1	98	1.70E+o5	0.68	0.02	0.29		0.06	0.01	0.04
	182G4-FF	2	230000			0.0001					0.11				0.88					0.01		23000	4.4	Missing
	183G1-FF	0	6800				0.015				0.162				0.823							1100	3	100	4100	0.18	0.03	0.04	0.12	0.17	0.01	0.02	0.37								0.07
	183G2-FF	2	700						1													0	0	101	3800	0.04	0.08	0.03	0.04	0.25	0.05	0.05	0.42								0.04
HL8	BB39-FF	1	67000000								0.31	0.63			0.06							21000000	7.3	33	300000			0.02	0.1			0.76							0.11
	BB40-FF	3	10000000								0.07	0.93			0.0001							700000	5.8	34	4200000	0.12	0.01	0.04				0.66	0.04						0.08		0.05
	BB41-FF	2	8900000								0.0001	1			0.0004							890	2.9	Missing
	BB42-FF	2	790000									0.995			0.005							0	0	35	5500000	0.05	0.02	0.2	0.04			0.68	0.01
	BB43-FF	2	20000000									0.88			0.12							0	0	Missing
	BB44-FF	1	620000									0.995			0.005							0	0	36	870000		0.26	0.26	0.22		0.09		0.12				0.02				0.03
	BB45-FF	1	470000								0.015	0.545			0.44							6300	3.8	37	180000	0.01	0.02	0.06	0.03			0.33	0.24				0.16				0.15
	BB46-FF	2	48000000								0.045	0.625			0.33							2200000	6.3	38	8100000	0.75	0.06	0.01	0.13			0.01	0.04
HL9	BB47-FF	2	51000000		0.045						0.105	0.735	0.03	0.05	0.03			0.005				2600000	6.4	39	10000000	0.01	0.15	0.43	0.3	0.02			0.09
	BB48-FF	3	30000000								0.005	0.965			0.03							150000	5.2	40	2800000	0.01	0.22		0.58			0.03	0.13								0.03
	BB49-FF	1	44000000								0.065	0.935										2900000	6.5	41	68000000	0.003	0.08	0.22	0.62				0.06								0.02
	BB50-FF	0	480000								0.29	0.4			0.31							140000	5.1	42	1400000	0.06	0.03	0.32	0.48			0.01	0.07
	BB51-FF	3	37000000								0.15	0.62	0.03	0.2								5600000	6.7	43	67000000	0.003	0.56	0.09	0.02				0.3								0.03
	BB52-FF	2	38000000								0.14	0.82		0.04								5300000	6.7	44	6400000	0.001	0.06	0.7	0.08			0.01	0.12								0.03
	BB53-FF	2	4600		0.48						0.33		0.02	0.17								1500	3.2	45	55000	0.02		0.17	0.8

## Sheet: Sheet2
				Column	Strain	Species
				E	HF2	Streptococcus suis
				F	HF3	Staphylococcus aureus MS4
				G	HF6	Bacillus licheniformis
				H	HF7	Staphylococcus lentus
				I	HF8	Enterococcus durans
				J	HF9	Enterococcus faecium DO
				K	HF11	Staphylococcus epidermidis
				L	HF12	Lactobacillus murinus or L. animalis
				M	HF13	Escherichia coli O83
				N	HF17	Proteus mirabilis
				O	HF18	Enterococcus faecales V583
				P	HF20	Lactobacillus acidophilus
				Q	HF24	Enterobacter aerogenes
				R	HF25	Streptococcus agalactae
				S	HF57	Lactobacillus johnsonii
				T	HF63	Staphylococcus lugdunensis
				U	HF78	Staphylococcus haemolyticus
				W	L. murinus load, cfu/ml
				X	Decimal logarithm of L. murinus load
				Y	Sample number in high throughput sequencing
				Z	Bacterial load, cfu/ml, determined by real time PCR
				B	FF - formula fed, BF - breast fed
